# Supplementary material for: Ecosystem-scale greenhouse gas fluxes from actively extracted peatlands: water table depth drives interannual variability
Source: Copernicus journal article supplement (doi:10.5194/egusphere-2025-1111), 2025-04-03
Supplement: Supplementary file 1 [file egusphere-2025-1111-supplement.pdf]

## **Supporting Information for**

### **[Ecosystem-scale greenhouse gas fluxes from actively extracted peatlands: water table depth drives interannual variability]**

[Miranda L. Hunter<sup>1</sup>, Ian B. Strachan<sup>2</sup>, Paul Moore<sup>3</sup>, Sara Knox<sup>4</sup>, Maria Strack<sup>1</sup>]

<sup>1</sup>Department of Geography and Environmental Management, University of Waterloo, Waterloo, N2L 3G1, Canada; <sup>2</sup>Department of Geography and Planning, Queen's University, Kingston, K7L 3N6, Canada; <sup>3</sup>School of Earth, Environment, and Society, McMaster University, Hamilton, L8S 4K1, Canada; <sup>4</sup>Department of Geography, McGill University, Montreal, H3A 0G4, Canada]

#### **Table of Contents:**

##### **Text S1**

##### **Figures S1-S4**

##### **Tables S1-S6**

**Text S1** Methods for assessing the effect of extraction activities on CO<sub>2</sub> emissions.

The trail camera was oriented westward and programmed to take a photo when it detected motion in front of it, with a detection range of ~ two peat fields. The photos were visually inspected to confirm the presence of extraction activity. Vacuum harvesting and harrowing activities were distinguished by the unique equipment required for each. To account for the unknown activity on the eastern half of the site, we added thirty minutes before and after the observed extraction activity time window. This was based on personal observations of extraction activity.

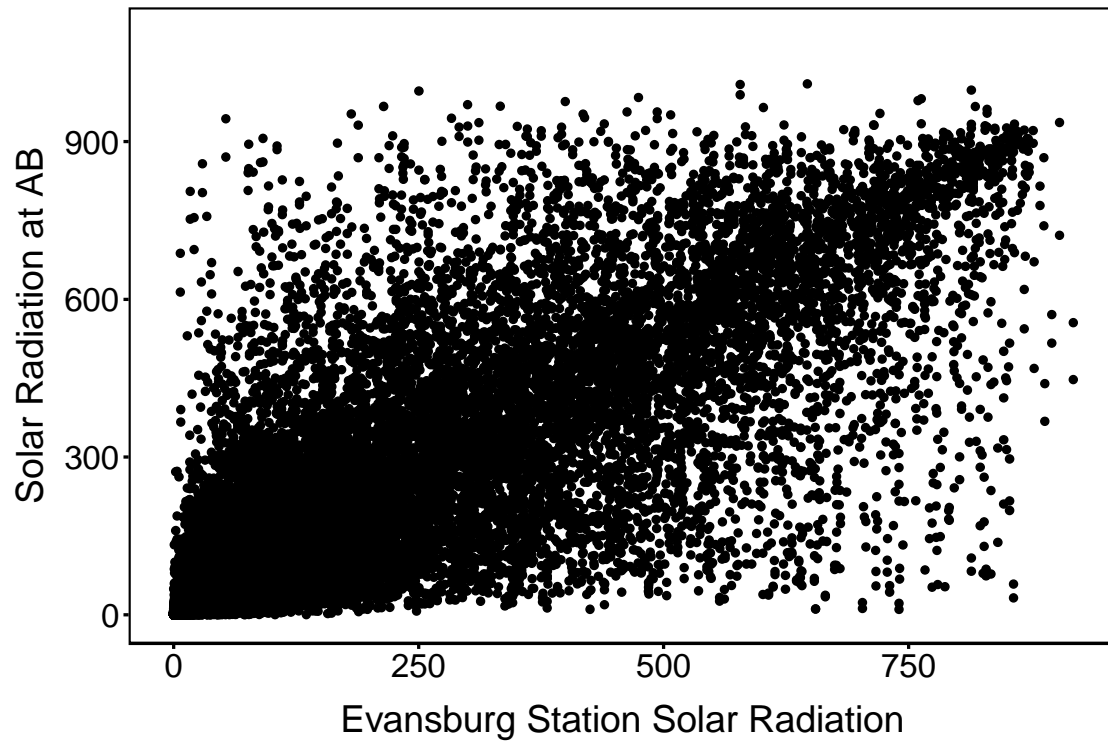

**Figure S1** Scatter plot of the incoming solar radiation data ( $\text{W m}^{-2}$ ) obtained from Evansburg 2 ADGM weather station (ACIS, 2023) versus the measured incoming solar radiation ( $\text{W m}^{-2}$ ) at AB. The linear regression is significant ( $F_{1,38451}=103305$ ,  $p<0.0001$ ), with an  $R^2$  of 0.73.

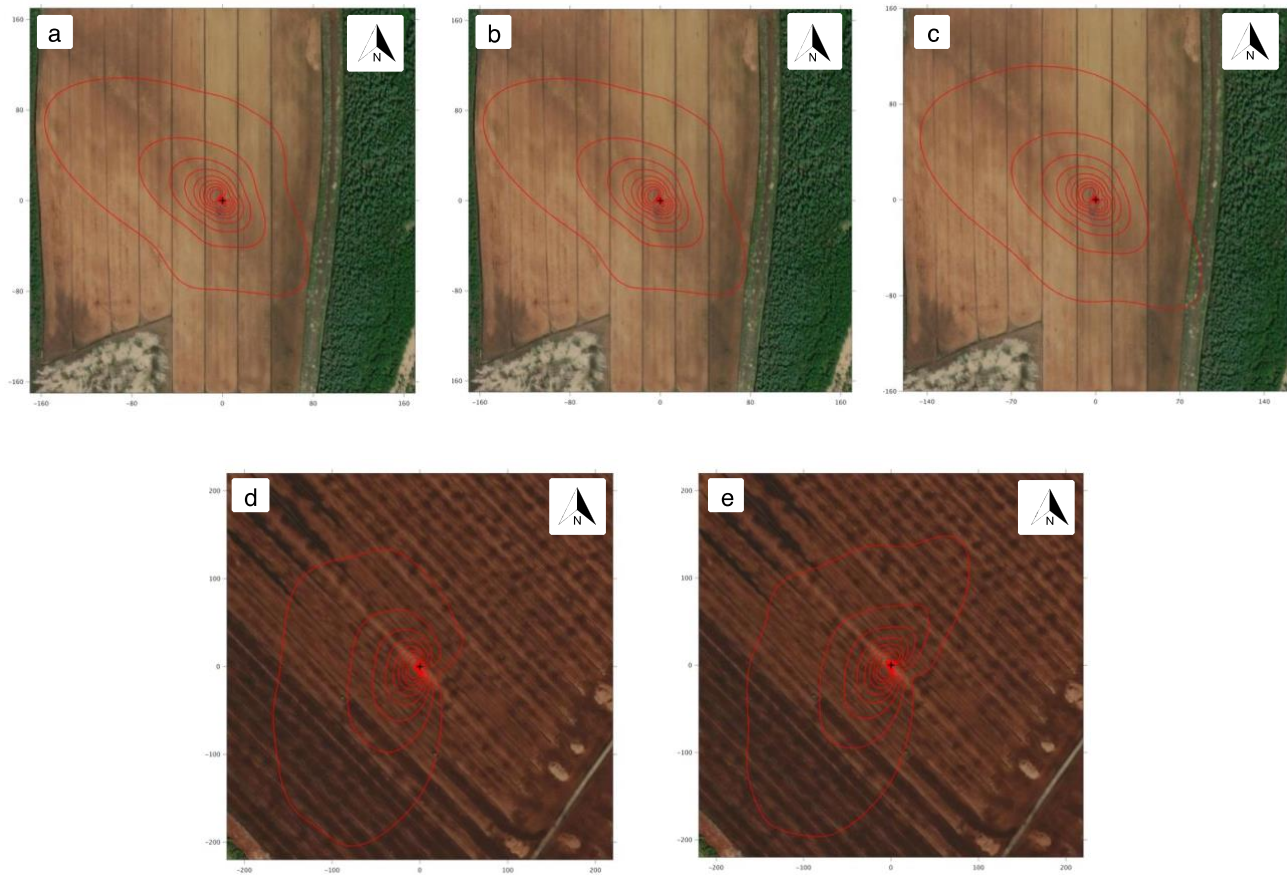

**Figure S2** 2D flux footprint probability contour maps of CO<sub>2</sub> at the AB site in 2020, (a) 2021 (b) and 2022 (c), and at the QC site in 2020 (d) and 2022 (e). The plots were created using the online tool by Kljun and others (2015). The scale bars along the x and y axes are in meters. The outermost contour line represents the 90<sup>th</sup> percentile probability.

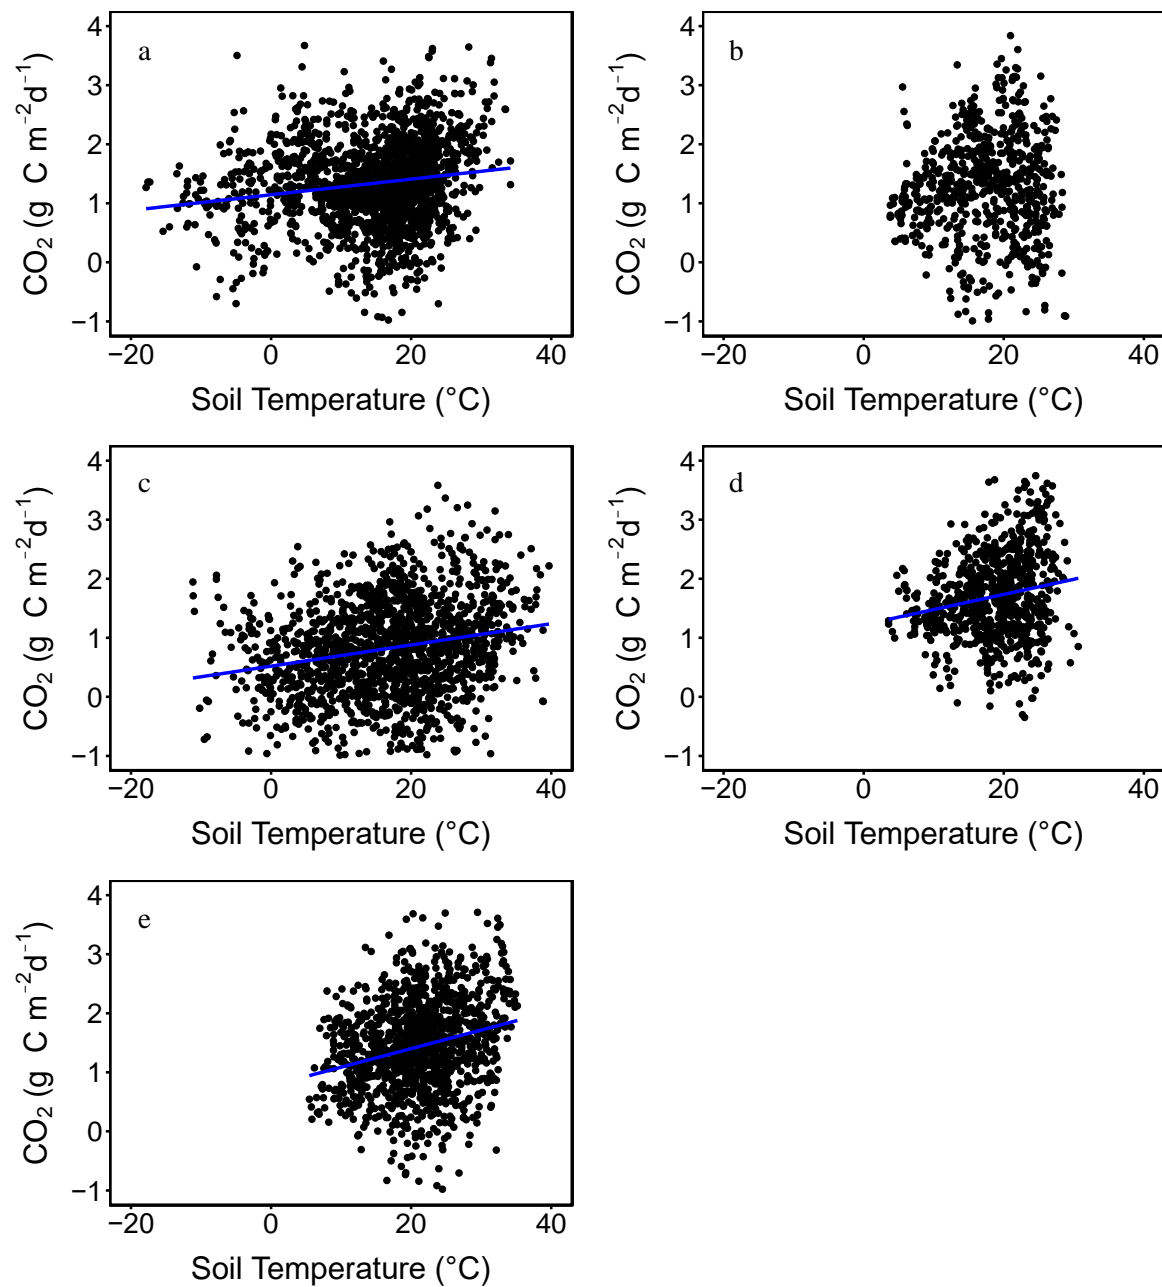

**Figure S3** Scatterplots showing the effect of half-hourly air temperature on CO<sub>2</sub> emissions in 2020 (a), 2021 (c) and 2022 (e) at AB, and in 2020 (b) and 2022 (d) at QC. Best fit lines were shown when linear regressions were significant. The explanatory power was 2.5%, 4.3% and 6.3% at AB in 2020, 2021 and 2022 respectively, and 3.5% at QC in 2022.

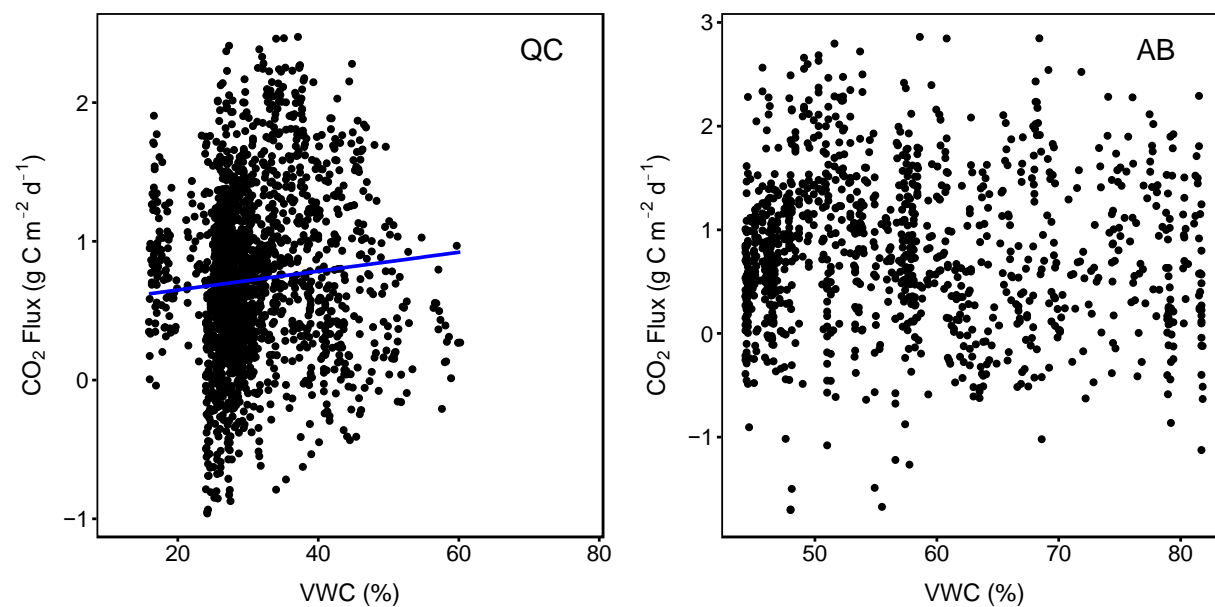

**Figure S4** Scatterplots showing the effect of half-hourly volumetric water content (VWC) on CO<sub>2</sub> fluxes at AB and QC. At QC, VWC explained less than 1% of the variation in CO<sub>2</sub> fluxes ( $F_{1,2177}=14.89$ ,  $p=0.0001$ ).

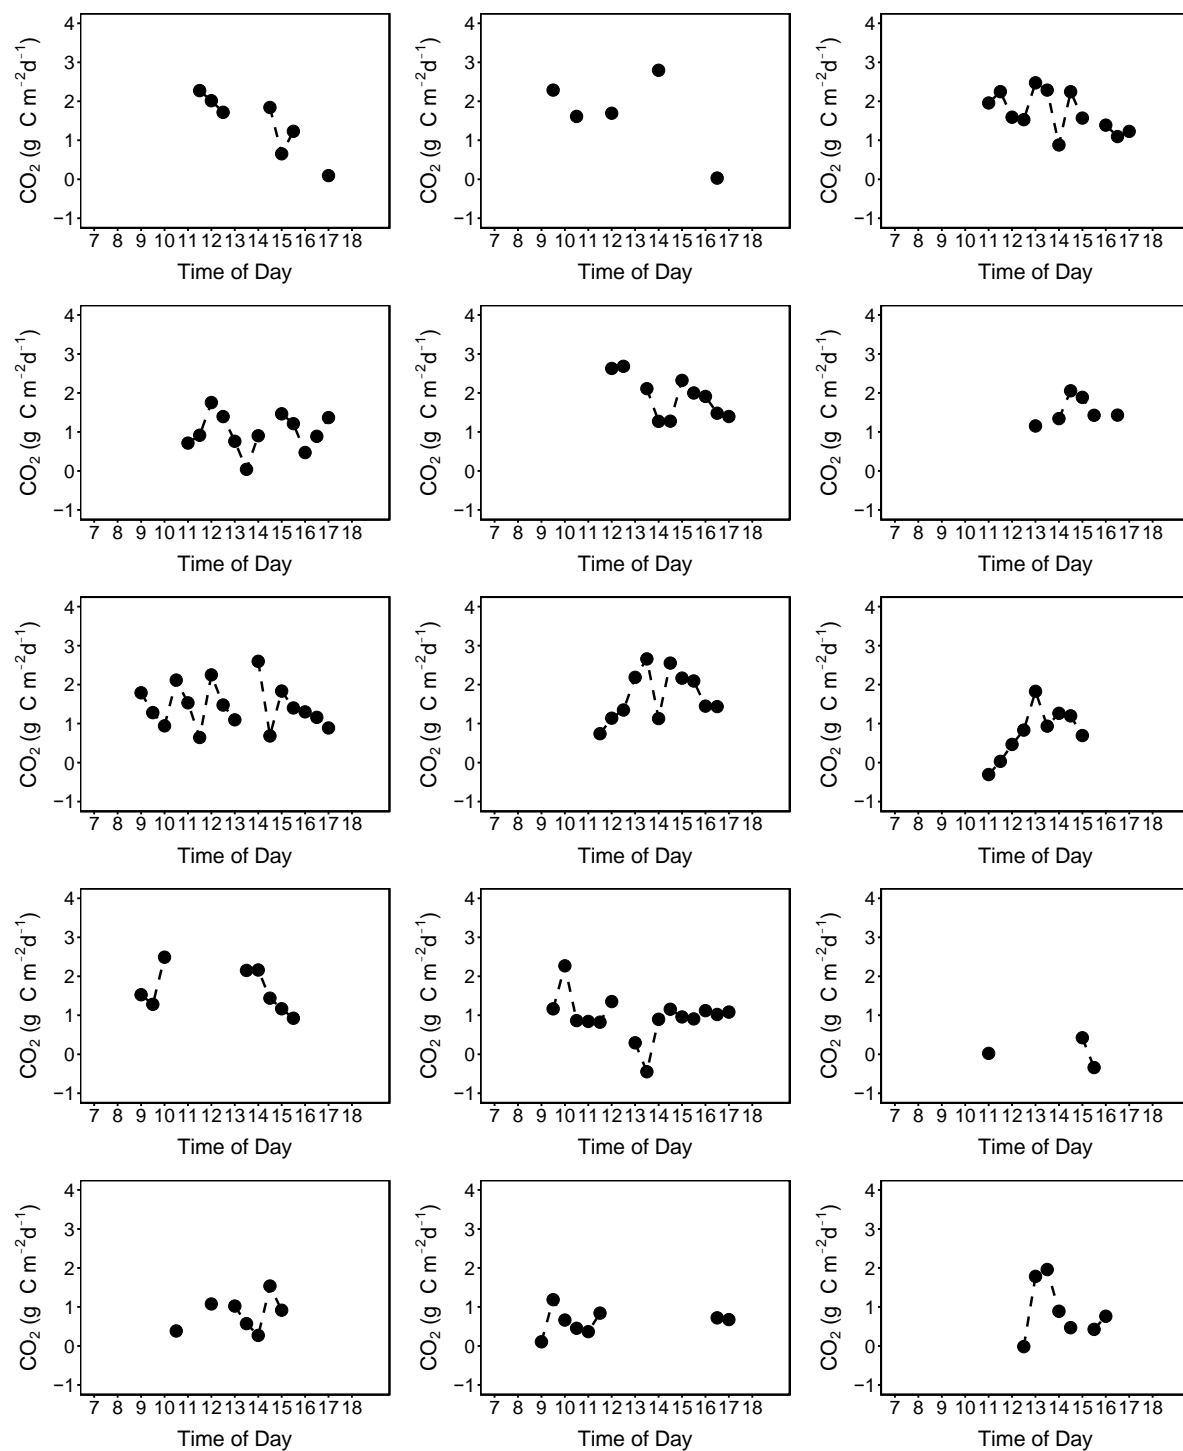

**Figure S5** Plot of CO<sub>2</sub> emissions over the course of 15 days during the period of August 17<sup>th</sup> to September 23<sup>rd</sup>, 2022 at AB. The purple and green boxes indicate periods when harrowing and vacuum harvesting occurred respectively.

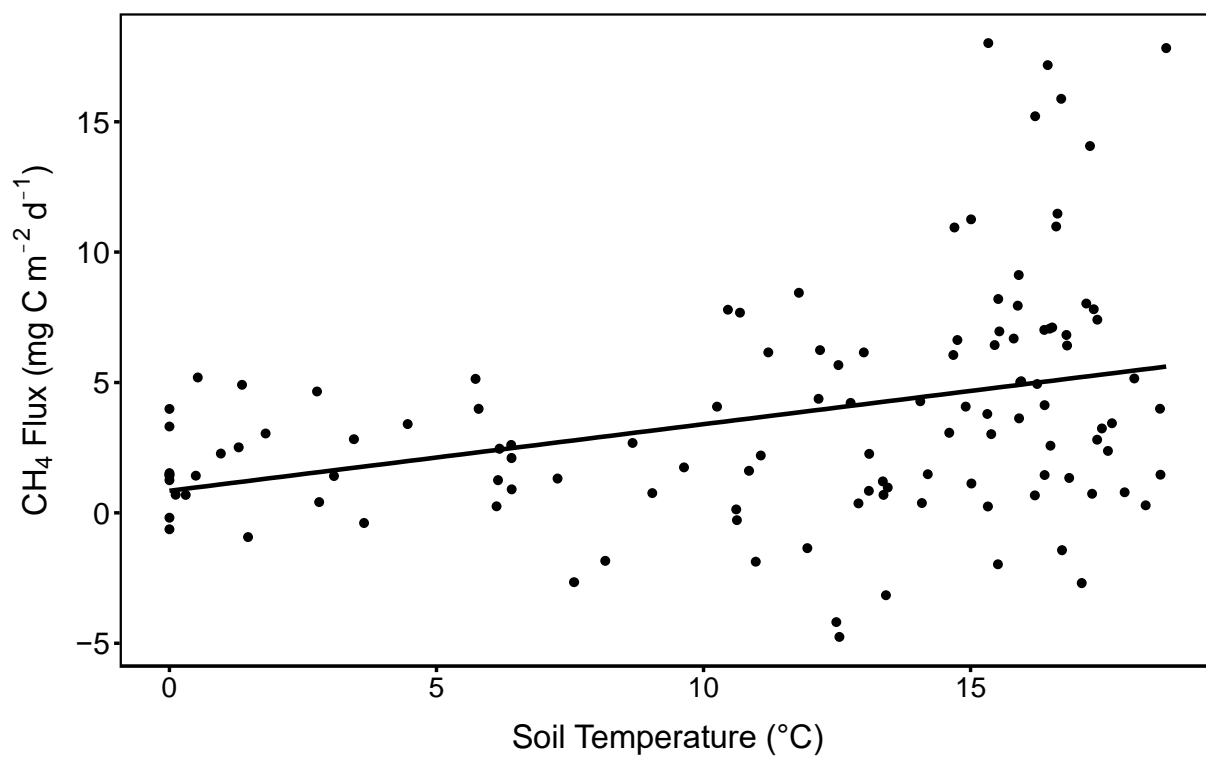

**Figure S6** Scatterplots showing the effect of soil temperature on daily daytime (9 am to 5:30 pm) CH<sub>4</sub> fluxes at AB in 2022. The significant linear regression explained 11% of the variation.

**Table S1** Percent of daytime and nighttime CO<sub>2</sub> fluxes per month in each year at AB. A value of n.m indicates that data was not measured that month. Fluxes were categorized as daytime and nighttime when the incoming solar radiation was greater than 20 W m<sup>-2</sup> and less than 20 W m<sup>-2</sup>, respectively. In cases when the eddy covariance tower was not operating for the full month, only periods when it was operating were used for calculations.

|           | 2020                         |                                | 2021                         |                                | 2022                         |                                |
|-----------|------------------------------|--------------------------------|------------------------------|--------------------------------|------------------------------|--------------------------------|
|           | Percent<br>Daytime<br>Fluxes | Percent<br>Nighttime<br>Fluxes | Percent<br>Daytime<br>Fluxes | Percent<br>Nighttime<br>Fluxes | Percent<br>Daytime<br>Fluxes | Percent<br>Nighttime<br>Fluxes |
| January   | 1.4                          | 2.1                            | 20.5                         | 4.7                            | n.m                          | n.m                            |
| February  | 14.8                         | 2.8                            | 18.5                         | 5.3                            | n.m                          | n.m                            |
| March     | 34.2                         | 8.4                            | 39.1                         | 15.0                           | n.m                          | n.m                            |
| April     | 41.7                         | 10.8                           | 50.8                         | 13.3                           | n.m                          | n.m                            |
| May       | 37.8                         | 10.3                           | 42.9                         | 10.2                           | 46.5                         | 15.0                           |
| June      | 38.8                         | 4.6                            | 50.1                         | 9.1                            | 27.8                         | 6.1                            |
| July      | 33.2                         | 5.5                            | 37.7                         | 8.2                            | 27.7                         | 2.1                            |
| August    | 38.0                         | 8.1                            | 31.0                         | 3.7                            | 34.9                         | 4.6                            |
| September | 43.5                         | 4.4                            | n.m                          | n.m                            | 40.8                         | 6.2                            |
| October   | 30.8                         | 8.2                            | n.m                          | n.m                            | 44.4                         | 7.1                            |
| November  | 13.9                         | 2.8                            | n.m                          | n.m                            | n.m                          | n.m                            |
| December  | 13.4                         | 2.0                            | n.m                          | n.m                            | n.m                          | n.m                            |



**Table S2** Percent of daytime and nighttime CO<sub>2</sub> fluxes per month in each year at QC. A value of n.m indicates that data was not measured that month. Fluxes were categorized as daytime and nighttime when the incoming solar radiation was greater than 20 W m<sup>-2</sup> and less than 20 W m<sup>-2</sup>, respectively. In cases when the eddy covariance tower was not operating for the full month, only periods when it was operating were used for calculations.

|           | 2020                   |                          | 2022                   |                          |
|-----------|------------------------|--------------------------|------------------------|--------------------------|
|           | Percent Daytime Fluxes | Percent Nighttime Fluxes | Percent Daytime Fluxes | Percent Nighttime Fluxes |
| January   | n.m                    | n.m                      | n.m                    | n.m                      |
| February  | n.m                    | n.m                      | n.m                    | n.m                      |
| March     | n.m                    | n.m                      | n.m                    | n.m                      |
| April     | n.m                    | n.m                      | n.m                    | n.m                      |
| May       | n.m                    | n.m                      | 44.7                   | 17.1                     |
| June      | n.m                    | n.m                      | 38.8                   | 13.2                     |
| July      | 45.3                   | 12.8                     | 42.7                   | 21.3                     |
| August    | 36.5                   | 12.8                     | 38.8                   | 15.4                     |
| September | 44.6                   | 17.2                     | 50.5                   | 23.9                     |
| October   | 29.7                   | 13.9                     | 45.8                   | 18.8                     |
| November  | n.m                    | n.m                      | n.m                    | n.m                      |
| December  | n.m                    | n.m                      | n.m                    | n.m                      |

**Table S3** Percent of daytime and nighttime CH<sub>4</sub> fluxes per month in each year at AB. A value of n.m indicates that data was not measured that month. Fluxes were categorized as daytime and nighttime when the incoming solar radiation was greater than 20 W m<sup>-2</sup> and less than 20 W m<sup>-2</sup>, respectively. In cases when the eddy covariance tower was not operating for the full month, only periods when it was operating were used for calculations.

| Alberta   |                           |                             |
|-----------|---------------------------|-----------------------------|
|           | Percent Daytime<br>Fluxes | Percent Nighttime<br>Fluxes |
| January   | n. m                      | n. m                        |
| February  | n. m                      | n. m                        |
| March     | n. m                      | n. m                        |
| April     | n. m                      | n. m                        |
| May       | 19.3                      | 5.3                         |
| June      | 12.1                      | 1.9                         |
| July      | 10.6                      | 0.2                         |
| August    | 12.4                      | 0.3                         |
| September | 0                         | 0                           |
| October   | 0                         | 0                           |
| November  | n. m                      | n. m                        |
| December  | n. m                      | n. m                        |

**Table S4** Monthly 9 am to 5:30 pm local time average and median (in brackets) CO<sub>2</sub> emissions (g C m<sup>-2</sup> d<sup>-1</sup>) at AB and QC in 2020, 2021 and 2022. A value of n.m indicates that data was not measured that month. Letters indicate when fluxes are significantly different, based on a linear model on the effect of the interaction of location and month on CO<sub>2</sub> fluxes.

|           | Quebec Site                    |                                 | Alberta Site                    |                                 |                                 |
|-----------|--------------------------------|---------------------------------|---------------------------------|---------------------------------|---------------------------------|
|           | 2020                           | 2022                            | 2020                            | 2021                            | 2022                            |
| March     | n.m                            | n.m                             | 0.13 <sup>bc</sup><br>(0.17)    | -0.01 <sup>ab</sup><br>(0.01)   | n.m                             |
| April     | n.m                            | n.m                             | 0.45 <sup>efgh</sup><br>(0.43)  | -0.19 <sup>a</sup><br>(-0.19)   | n.m                             |
| May       | n.m                            | 0.91 <sup>klm</sup><br>(0.87)   | 0.34 <sup>cdef</sup><br>(0.42)  | 0.16 <sup>bcd</sup><br>(0.25)   | 0.50 <sup>efghi</sup><br>(0.45) |
| June      | n.m                            | 1.09 <sup>m</sup><br>(1.18)     | 0.40 <sup>cdefg</sup><br>(0.45) | 0.22 <sup>bcde</sup><br>(0.20)  | 0.68 <sup>ghijk</sup><br>(0.66) |
| July      | 0.74 <sup>ijkl</sup><br>(0.75) | 1.02 <sup>lm</sup><br>(1.07)    | 0.71 <sup>hijk</sup><br>(0.68)  | 0.76 <sup>ijkl</sup><br>(0.78)  | 1.00 <sup>lm</sup><br>(1.01)    |
| August    | 0.39 <sup>cdef</sup><br>(0.37) | 0.84 <sup>jklm</sup><br>(0.81)  | 0.74 <sup>ijkl</sup><br>(0.79)  | 0.43 <sup>defgh</sup><br>(0.37) | 1.00 <sup>lm</sup><br>(1.07)    |
| September | 0.55 <sup>fghi</sup><br>(0.54) | 0.56 <sup>fghij</sup><br>(0.56) | 0.54 <sup>fghi</sup><br>(0.49)  | n.m                             | 0.84 <sup>jklm</sup><br>(0.90)  |
| October   | 0.31 <sup>cdef</sup><br>(0.21) | 0.53 <sup>fghi</sup><br>(0.55)  | 0.34 <sup>cdef</sup><br>(0.37)  | n.m                             | 0.52 <sup>fghi</sup><br>(0.59)  |

**Table S5** Monthly 9 am to 5:30 pm local time average and median (in brackets) CH<sub>4</sub> emissions (mg C m<sup>-2</sup> d<sup>-1</sup>) at AB 2022. Letters indicate when fluxes are significantly different, based on a linear model on the effect month on CH<sub>4</sub> fluxes.

| Month  | CH <sub>4</sub> Flux      |
|--------|---------------------------|
| May    | 6.54 <sup>a</sup> (7.17)  |
| June   | 5.48 <sup>a</sup> (5.89)  |
| July   | 7.73 <sup>ab</sup> (7.63) |
| August | 9.13 <sup>b</sup> (9.35)  |

**Table S6** Outputs of linear model on the effect of soil temperature at 20 cm depth (at AB) and 10 cm depth (at QC) on daily CO<sub>2</sub> emissions across the study years. The CO<sub>2</sub> data has been divided in wet periods (WTD < 25 cm), moderate periods (50 cm > WTD > 25 cm), dry periods (75 cm > WTD > 50 cm) and very dry periods (WTD > 75 cm).

|         | Depth    | DF    | F     | P       | R <sup>2</sup> |
|---------|----------|-------|-------|---------|----------------|
| AB site |          |       |       |         |                |
|         | Wet      | 1, 11 | 2.62  | 0.13    | 0.12           |
|         | Moderate | 1, 31 | 47.13 | <0.0001 | 0.59           |
|         | Dry      | 1, 56 | 0.17  | 0.68    | -0.02          |
| QC site |          |       |       |         |                |
|         | Moderate | 1, 18 | 42.68 | <0.0001 | 0.69           |
|         | Dry      | 1, 92 | 24.34 | <0.0001 | 0.20           |
|         | Very Dry | 1, 97 | 9.95  | 0.0021  | 0.08           |
